# Supplementary material for: Safety and Immunogenicity of Homologous and Heterologous Adenoviral-Vectored and mRNA COVID-19 Vaccine Regimens in Radiotherapy Patients
Source: MDPI journal article supplement (doi:10.3390/vaccines11071135), 2023-06-23
Supplement: s1 [file s1]

# Supplementary Materials

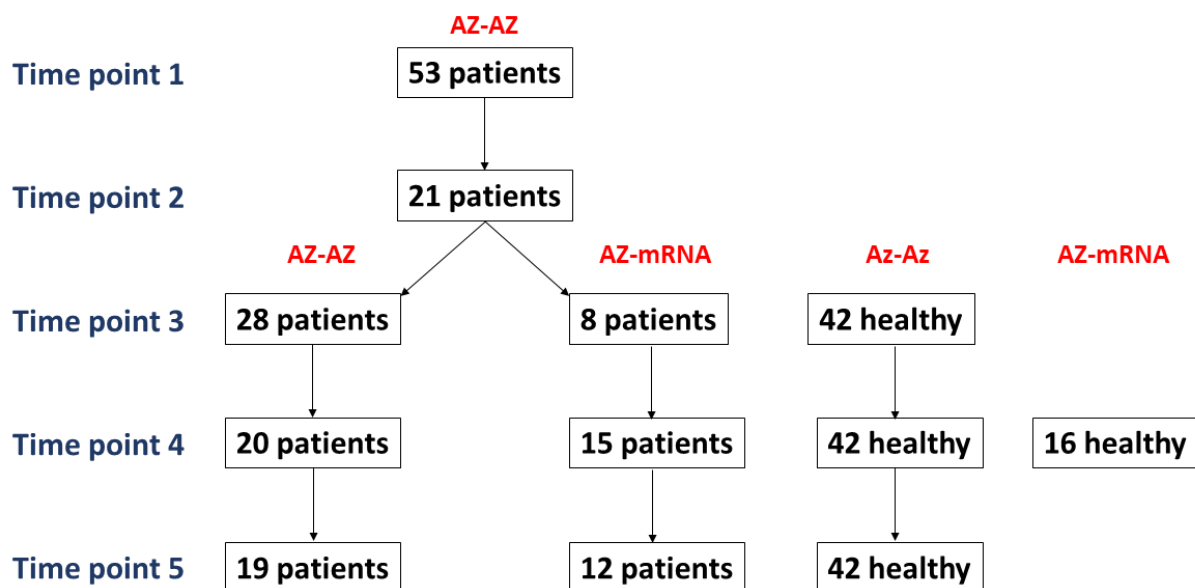

Figure S1. A flow diagram of data collection at each time-point.

Table S1. The GMT and GMR for the anti-RBD total Ig levels of the treatment groups.

|                     | AZ-AZ group      | AZ-mRNA group       | Healthy controls (AZ-AZ) | Healthy controls (AZ-mRNA) |
|---------------------|------------------|---------------------|--------------------------|----------------------------|
| <b>Time-point 3</b> |                  |                     |                          |                            |
| GMT (95% CI)        | 9.3 (3.9-22.5)   | 18.4 (6.5-52.2)     | 76 (55.3-105)            | NA                         |
| GMR (95% CI)        | 0.12 (0.05-0.28) | 0.24 (0.1-0.61)     | 1                        | NA                         |
| P-value             | <0.001           | 0.003               | Ref                      |                            |
| <b>Time-point 4</b> |                  |                     |                          |                            |
| GMT (95% CI)        | 188.4 (67.1-529) | 1400.8 (429.5-4566) | 945 (708-1261)           | 5169.9 (3582.2-7461.5)     |
| GMR (95% CI)        | 0.04 (0.01-0.10) | 0.27 (0.09-0.79)    | 0.18 (0.08-0.44)         | 1                          |
| P-value             | <0.001           | 0.02                | <0.001                   | Ref                        |
| <b>Time-point 5</b> |                  |                     |                          |                            |
| GMT (95% CI)        | 133.1 (41.9-423) | 1018.8(395-2628)    | 538 (389-744)            | NA                         |
| GMR (95% CI)        | 0.25 (0.1-0.59)  | 1.89 (0.68-5.28)    | 1                        | NA                         |
| P-value             | 0.002            | 0.22                | Ref                      |                            |

GMT=geometric mean titer; GMR=geometric mean titer ratio; CI=confidence interval; Ref=reference; NA=not applicable.

**Table S2.** Comparison of the baseline (time-point 1) complete blood count analysis according to seroconversion status at 1 month after first vaccination (time-point 2).

|                                       | Seropositivity      | Seronegativity      | P-value           |
|---------------------------------------|---------------------|---------------------|-------------------|
| <b>Hemoglobin</b> , mean(SD)          | 12.1 (1.5)          | 11.1 (0.9)          | 0.09*             |
| <b>Platelets</b> , mean(SD)           | 266,500 (62,100)    | 292,800 (90,100)    | 0.45*             |
| <b>White blood cell</b> , median(IQR) | 5,345 (4,660-6,900) | 5,260 (4,380-8,760) | 0.89 <sup>¥</sup> |
| <b>Neutrophil</b> , median(IQR)       | 3,690 (2,610-4,330) | 3,830 (2,770-5,250) | 0.78 <sup>¥</sup> |
| <b>Lymphocyte</b> , median(IQR)       | 1,015 (940-1,900)   | 1,510 (780-2,140)   | 0.94 <sup>¥</sup> |

\* using two sample independent t-test; <sup>¥</sup> using Wilcoxon rank-sum test.

**Table S3.** Seropositivity rate of the treatment groups stratified by gender.

|                     | AZ-AZ group  | AZ-mRNA group | Healthy controls (AZ-AZ) | P-value |
|---------------------|--------------|---------------|--------------------------|---------|
| <b>Time-point 3</b> |              |               |                          |         |
| Male                | 12/14 (85.7) |               | 21/21 (100)              | 0.07    |
| Female              | 21/26 (80.8) |               | 21/21 (100)              | 0.08    |
| P-value             | 0.72         | 0.50          | -                        |         |
| <b>Time-point 4</b> |              |               |                          |         |
| Male                | 6/7 (85.7)   | 4/4 (100)     | 21/21 (100)              | 0.34    |
| Female              | 13/13 (100)  | 11/11 (100)   | 21/21 (100)              | -       |
| P-value             | 0.35         | -             | -                        |         |
| <b>Time-point 5</b> |              |               |                          |         |
| Male                | 4/6 (66.7)   | 3/3 (100)     | 21/21 (100)              | 0.041   |
| Female              | 13/13 (100)  | 9/9 (100)     | 21/21 (100)              | -       |
| P-value             | 0.09         | -             | -                        |         |

**Table S4.** The GMT and GMR for anti-RBD total Ig levels of the low-dose and high-dose subgroups.

|                      | All                 | Low-dose            | High-dose             | GMR (95%CI)       | p-value |
|----------------------|---------------------|---------------------|-----------------------|-------------------|---------|
| <b>AZ-AZ group</b>   |                     |                     |                       |                   |         |
| TP1                  | <0.4                | <0.4                | <0.4                  | -                 | -       |
| TP2                  | 4.3 (1.4-13)        | 3.6 (0.8-16.5)      | 5.2 (0.7-36.5)        | 0.69 (0.07-6.82)  | 0.74    |
| TP3                  | 9.3 (3.9-22.5)      | 6.4 (1.7-23.1)      | 15.7 (4.2-59.4)       | 0.41 (0.07-2.43)  | 0.31    |
| TP4                  | 188.4 (67.1-529)    | 244.9 (84.6-708.8)  | 102.2 (4.3-2402.3)    | 2.4 (0.24-23.49)  | 0.43    |
| TP5                  | 133.1 (41.9-423)    | 142 (37.7-536.3)    | 115.4 (4.9-2734)      | 1.23 (0.09-16.07) | 0.87    |
| <b>AZ-mRNA group</b> |                     |                     |                       |                   |         |
| TP1                  | <0.4                | <0.4                | <0.4                  | -                 | -       |
| TP2                  | NA                  | NA                  | NA                    | -                 | -       |
| TP3                  | 18.4 (6.5-52.2)     | 16.7 (2.2-127.2)    | 20.3 (5.8-71.8)       | 0.82 (0.09-7.17)  | 0.85    |
| TP4                  | 1400.8 (429.5-4566) | 1571.5 (92.7-26634) | 1266.6 (536.3-2991.4) | 1.24 (0.1-14.71)  | 0.85    |
| TP5                  | 1018.8(395-2628)    | 2116 (224-19984)    | 604 (226-1618)        | 3.5 (0.56-22.04)  | 0.16    |

Data presents geometric mean titer (GMT) with 95% confidence interval (CI), High-dose group is used as reference. *GMR*= Geometric mean titer ratio; *TP*=Time point; *NA*=not available

**Table S5.** Comparison of the complete blood count analysis in the low-dose and high-dose groups at time-point 1 and 3.

|                         | All              | Low dose         | High dose        | P-value |
|-------------------------|------------------|------------------|------------------|---------|
| <b>Hemoglobin</b>       |                  |                  |                  |         |
| TP1                     | 11.6 (10.8-12.3) | 11.6 (11-12.3)   | 11.5 (10.1-12.9) | 0.83    |
| TP3                     | 11.2 (9.9-12.1)  | 10.7 (8.9-11.9)  | 11.4 (10.5-12.2) | 0.17    |
| <b>Platelets</b>        |                  |                  |                  |         |
| TP1                     | 284 (244-320)    | 251 (240-297)    | 304 (246-377)    | 0.09    |
| TP3                     | 247 (223-291)    | 231 (191-292)    | 253.5 (224-286)  | 0.45    |
| <b>White blood cell</b> |                  |                  |                  |         |
| TP1                     | 5570 (4660-7760) | 5245 (4370-6600) | 6920 (5160-8760) | 0.11    |
| TP3                     | 5620 (4640-7330) | 5620 (4630-7330) | 5750 (4640-8330) | 0.83    |
| <b>Neutrophil</b>       |                  |                  |                  |         |
| TP1                     | 3900 (2860-5250) | 3115 (2770-4610) | 4330 (3410-5550) | 0.27    |
| TP3                     | 3910 (3100-5590) | 3850 (2980-5590) | 4085 (3100-5740) | 0.86    |
| <b>Lymphocyte</b>       |                  |                  |                  |         |
| TP1                     | 1150 (940-1930)  | 990 (870-1790)   | 1860 (1010-2510) | 0.06    |
| TP3                     | 1210 (750-1830)  | 980 (650-1660)   | 1265 (860-1870)  | 0.45    |

TP=Time point.

**Table S6.** Adverse effects of the COVID-19 vaccine.

|                        | Dose 1 (N=53)<br>N (%) | Dose 2, N (%) |                |                 |
|------------------------|------------------------|---------------|----------------|-----------------|
|                        |                        | AZ<br>(N=31)  | mRNA<br>(N=22) | Total<br>(N=53) |
| <b>Pain (mild)</b>     | 18 (33.9)              | 3 (9.6)       | 5 (22.7)       | 8 (15.1)        |
| Pain (severe)          | 1 (1.9)                | 0 (0)         | 1 (4.5)        | 1 (1.9)         |
| Fever (mild)           | 10 (18.9)              | 1 (3.2)       | 3 (13.6)       | 4 (7.5)         |
| Chill (mild)           | 2 (3.75)               | 0 (0)         | 1 (4.5)        | 1 (1.9)         |
| Chill (severe)         | 2 (3.75)               | 1 (3.2)       | 1 (4.5)        | 2 (3.8)         |
| Headache (mild)        | 6 (11.3)               | 2 (6.4)       | 2 (9)          | 4 (7.5)         |
| Fatigue (mild)         | 5 (9.4)                | 4 (12.9)      | 1 (4.5)        | 5 (9.4)         |
| Fatigue (moderate)     | 2 (3.8)                | 0 (0)         | 1 (4.5)        | 1 (1.9)         |
| Myalgia (mild)         | 19 (35.8)              | 10 (32.3)     | 9 (40.9)       | 19 (35.8)       |
| Nausea-vomiting (mild) | 2 (3.8)                | 1 (3.2)       | 0 (0)          | 1 (1.9)         |
| Diarrhea (mild)        | 1 (1.9)                | 0 (0)         | 1 (4.5)        | 1 (1.9)         |
| Lymphadenopathy (mild) | 1 (1.9)                | 1 (3.2)       | 0 (0)          | 1 (1.9)         |
| Swelling               | 2 (3.8)                | 0 (0)         | 0 (0)          | 0 (0)           |
